# Supplementary material for: Glisson’s capsule matrix structure and function is altered in patients with cirrhosis irrespective of aetiology
Source: PubMed Central journal article supplement — JHEP Rep. 2023 Apr 7;5(9):100760. doi: 10.1016/j.jhepr.2023.100760 (PMC10393548; doi:10.1016/j.jhepr.2023.100760), 2023-04-07
Supplement: mmc1.pdf [file mmc1.pdf]

**Supplementary data**

**Glisson’s capsule matrix structure and function is altered in patients  
with cirrhosis irrespective of etiology**

Jessica Llewellyn, Caterina Fede, Abigail E. Loneker, Chet S. Friday, Michael W. Hast,  
Neil D. Theise, Emma E. Furth, Maria Guido, Carla Stecco, Rebecca G. Wells

**Table of Contents:**

|                                |     |
|--------------------------------|-----|
| Methods.....                   | 2-3 |
| Supplementary Figures .....    | 4-9 |
| Supplementary Table .....      | 10  |
| Supplementary References ..... | 11  |

## Supplementary Methods

### Histology & Staining:

For diaminobenzidine (DAB) labelling, sections were incubated in 3% H<sub>2</sub>O<sub>2</sub> to quench endogenous peroxidases (Sigma Aldrich, Rockville, MA), and then blocked for avidin/biotin (Vector Laboratories, Newark, CA) followed by StartingBlock™ T20/phosphate buffered saline (PBS) Blocking Buffer (Thermo Fisher Scientific, Waltham, MA). Samples were incubated in primary antibodies (staining buffer-0.2% Triton X-100, 0.1% bovine serum albumin, in PBS) overnight at 4°C. After washing in PBS, samples were washed and incubated with appropriate biotinylated secondary antibodies (Vector Laboratories) for 1 h at room temperature. Hyaluronic acid/hyaluronan (HA) was stained overnight using biotinylated HA binding protein (Millipore, Burlington, MA; 385911). All sections were washed and incubated with VECTASTAIN® ABC-HRP kit (Vector Laboratories). Staining was developed with a DAB substrate kit (Vector Laboratories). Elastic fibers were stained using an elastic stain kit (Sigma-Aldrich, HT25A-1KT) per the manufacturer's instructions. Sections were imaged by brightfield microscopy using a Nikon E600 and NIS-elements software (Nikon, Melville, NY).

For fluorescence staining, sections were blocked with StartingBlock™ T20/phosphate buffered saline (PBS) Blocking Buffer before incubation in primary antibodies (staining buffer) overnight at 4°C, followed by washing and incubation with fluorescent secondary antibody for 1 h at RT in the dark. Staining was imaged on a Zeiss Axio Observer 7 inverted microscope (Zeiss AxioCam 701 monochrome CMOS camera) and Zen blue software (Zeiss, White Plains, NY). All antibodies used are listed in Supplementary Table 1.

For picrosirius red staining, paraffin-embedded sections were dewaxed and rehydrated as above. Sections were then incubated in PSR stain (Poly Scientific R&D, Bay Shore, NY) for 1 h at RT. Sections were then quickly washed in acidified water (0.5% acetic acid in H<sub>2</sub>O), and dehydrated in 3 washes of 100% ethanol before clearing in Xylene and mounting.

### Image analysis

Thickness, percentage area and cell counting were analyzed using ImageJ (1). 3-5 images per liver were taken using the same parameters and analyzed using manually-determined regions of interest. Thickness was measured manually, with 5 measurements per image. Quantification of percentage area for DAB-stained slides was carried out using the deconvolution tool H DAB followed by thresholding. Percentage area of collagen in SHG cross-sections was also done using thresholding. Capsule areas were divided into two areas, the upper 70 µm and a lower layer (anything further than 70 µm from the

surface), using separate regions of interest. Cells were counted using the particle analysis tool. CD31 structures were counted manually using the count tool. Structures were defined as 2 or more clustered cells; some of these formed vessel-like structures.

Picro Sirius red staining was analyzed under polarized light with 6-10 images analyzed per sample. The PSR dye enhances the natural birefringence of the collagen when exposed to polarized light (2). PSR images were used to estimate a uniformity index of collagen fiber distribution, as previously described (3). This index calculates values between 1 (when the objects are distributed in a regular array) and 0 (when maximal clustering occurs). In order to apply this method, a subsampled binary image of the collagen pattern was obtained by extracting pixels corresponding to the points of a superimposed regular/systematic grid.

Crimping of collagen fibers was assessed on z stacks of SHG images. Depth and length were manually measured using the line tool in ImageJ. Approximately 20 fibers were measured in 3-8 images per sample. Orientation and alignment of collagen fibers were also assessed on SHG Z-stacks using a previously described method (4).

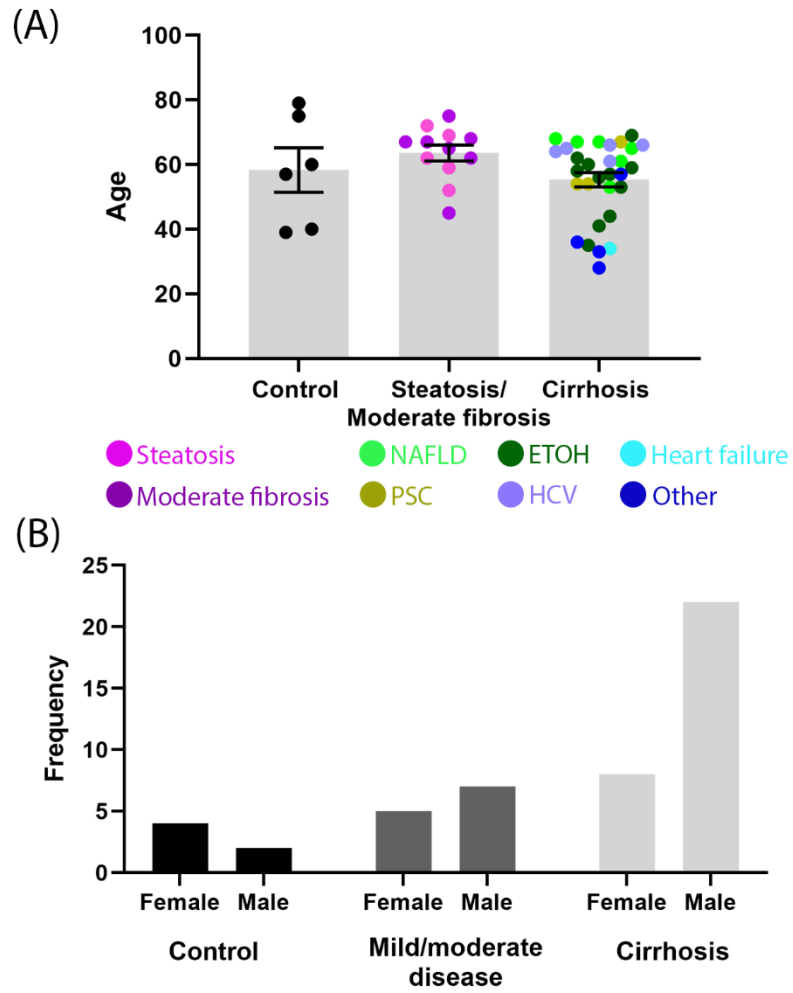

**1. Sex and age of patient samples.** (A) Patient ages for the control, steatosis/moderate fibrosis and cirrhotic samples used. (B) Sex distribution of patients for the control, steatosis/moderate fibrosis and cirrhotic samples used.

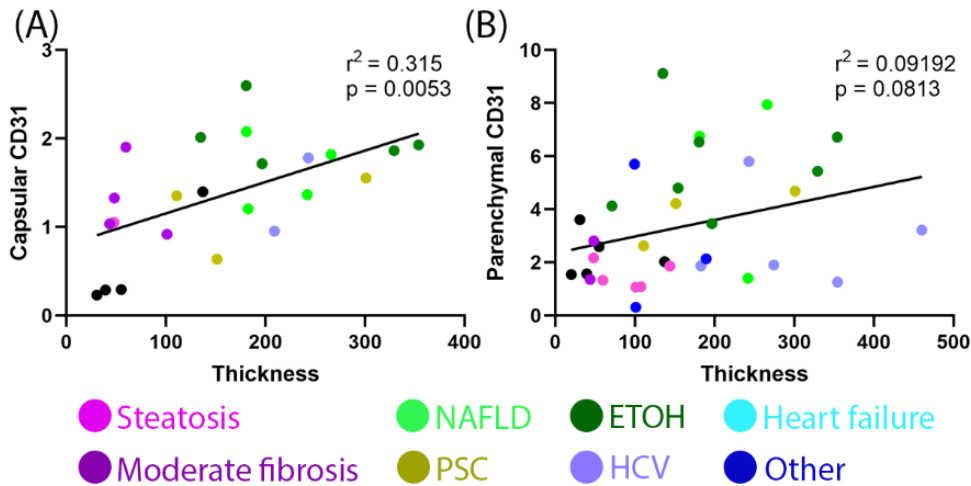

**Fig. S2. Capsule thickness correlates with capsular CD31 but not parenchymal CD31.** (A) Correlation between capsular thickness and capsular CD31 structures. (B) Correlation between capsular thickness and parenchymal CD31 percentage staining. Correlation analyzed by Pearson's correlation.

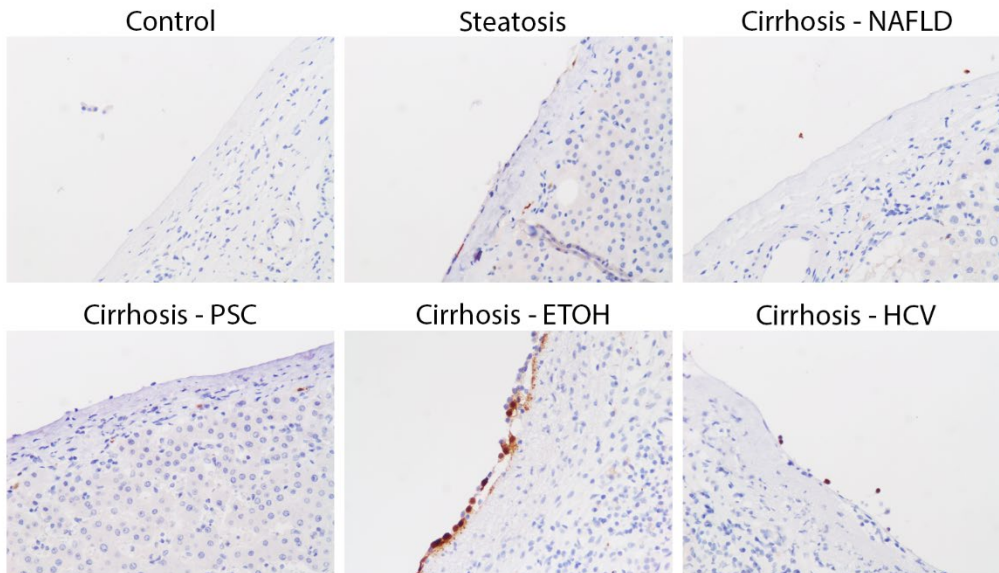

**Fig. S3. Mesothelial cells are found sporadically on the capsule surface.** Representative staining for calretinin in control and steatotic samples as well as cirrhotic samples of different etiologies.

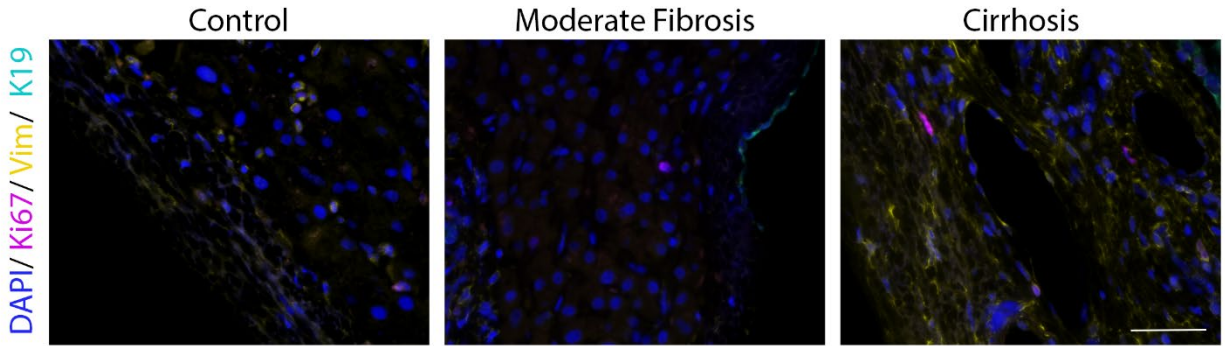

**Fig. S4. Proliferation is unchanged in disease.** Representative images of control, moderately fibrotic and cirrhotic samples (NAFLD in this example) stained for DAPI (nucleus; blue), Ki67 (proliferation, magenta), vimentin (fibroblasts; yellow), and K19 (BECs; cyan). Scale bars 50  $\mu$ m.

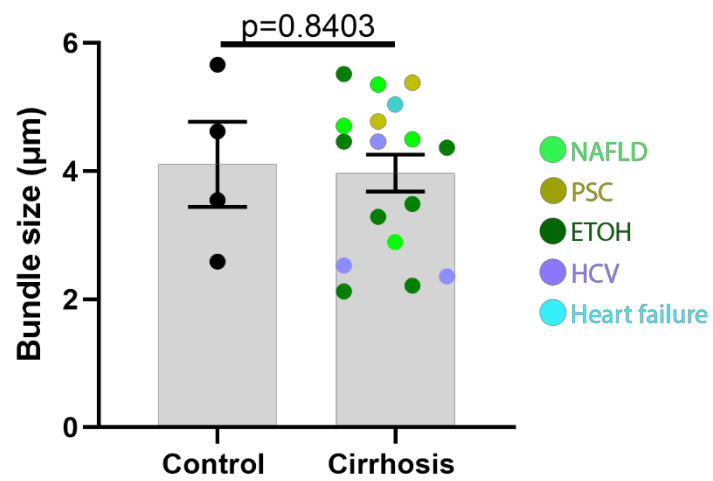

**Fig. S5. Collagen bundling is unaffected by disease.** Quantification of collagen bundle size. Data were analyzed with an unpaired two-tailed student t test and are shown as mean  $\pm$  SEM. N=4-17

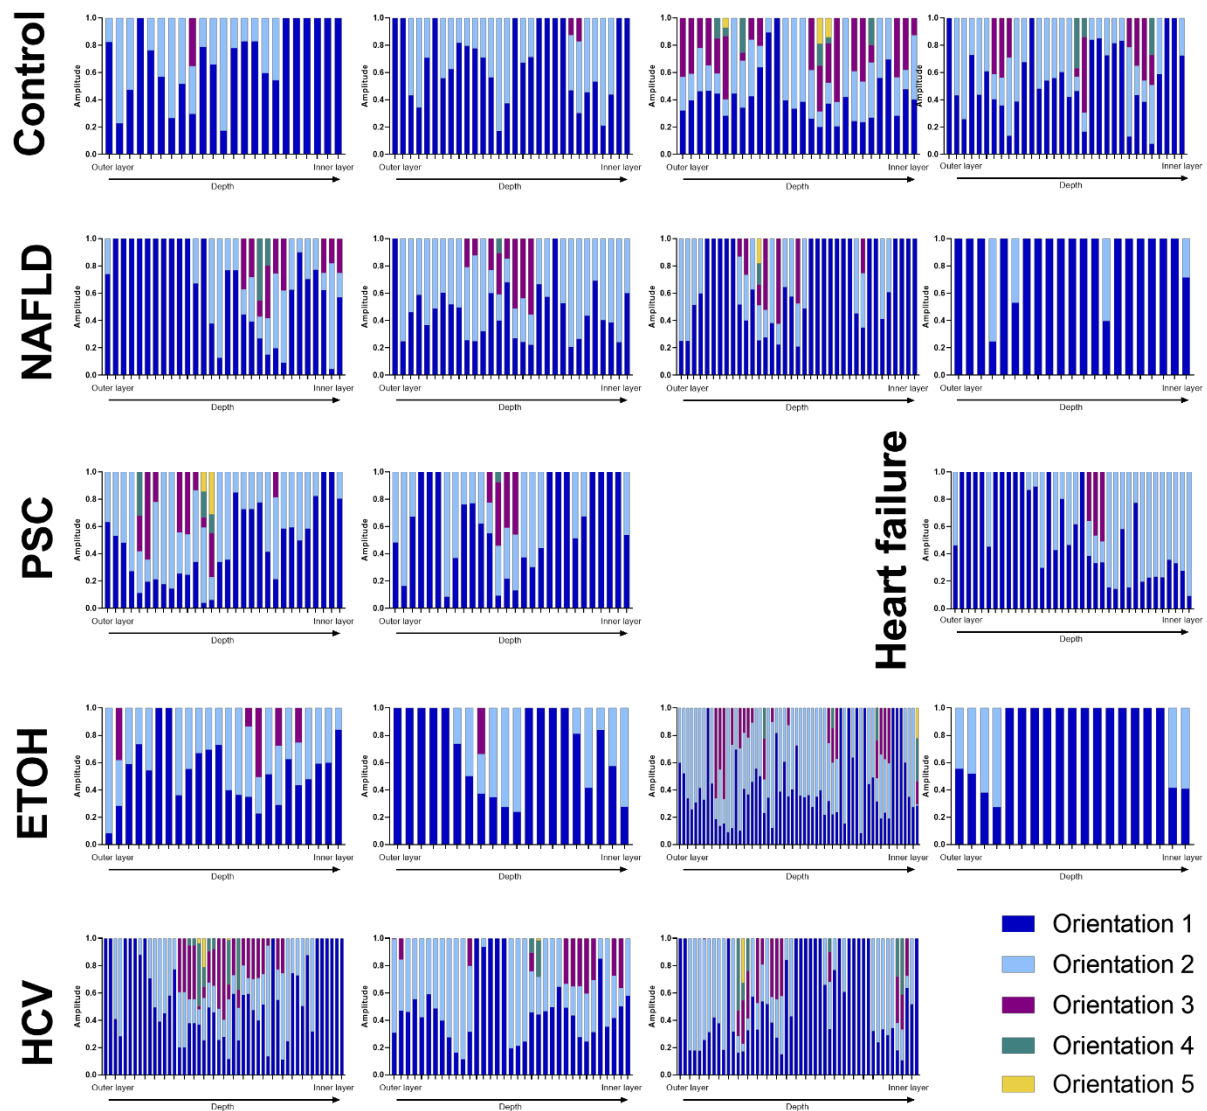

**Fig. S6. Amplitude of collagen orientation families.** Fibers from SHG z stacks placed into families of similar orientation for control and cirrhotic liver samples of different etiologies.



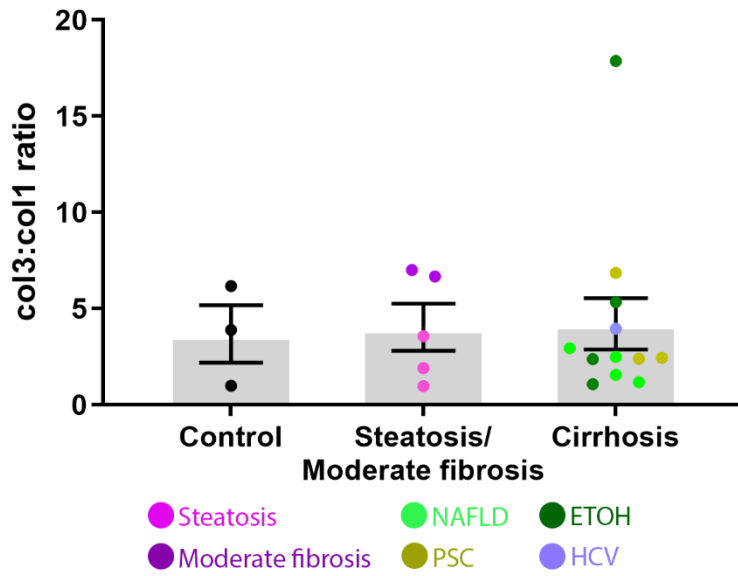

**Fig. S7. Collagen 3 to collagen 1 ratio is unaltered in capsules in diseased livers.**  
 Quantification of collagen 3 to 1 ratio. Data were analyzed by one-way ANOVA and are shown as mean  $\pm$  SEM. N=5-14.

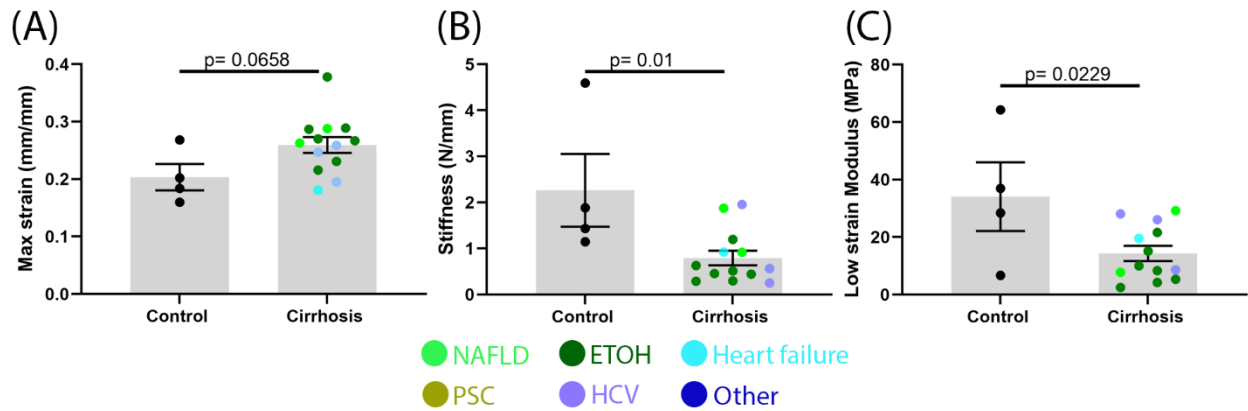

**Fig. S8. Liver capsule mechanics are altered in cirrhotic patients.** (A) Maximum strain at which tissue starts to fail. (B) Calculated stiffness. (C) Calculated moduli at low strain (approx. 4-6%). Data were analyzed with an unpaired two-way student t test and are shown as mean  $\pm$  SEM. N=4-14.

| <b>Primary antibodies</b> |                |                 |                                  |
|---------------------------|----------------|-----------------|----------------------------------|
| <b>Antigen</b>            | <b>Species</b> | <b>Dilution</b> | <b>Source</b>                    |
| αSMA                      | Mouse          | 1:100           | Sigma, A2547                     |
| Collagen 3                | Goat           | 1:100           | Southern Biotech ,1330-01        |
| Cytokeratin 7 (K7)        | Rabbit         | 1:200           | Abcam, ab68459                   |
| Cytokeratin 19 (K19)      | Mouse          | 1:200           | Abcam, ab7754                    |
| Ki67                      | Rabbit         | 1:100           | Abcam, ab16667                   |
| CD45                      | Rat            | 1:50            | Novus, NB100-77417SS             |
| Vimentin                  | Chicken        | 1:500           | Novus, NB300 223                 |
| CD68                      | Mouse          | 1:100           | Abcam, ab955                     |
| CD31                      | Rabbit         | 1:100           | Novus, NB100-2284                |
| Calretinin                | Rabbit         | 1:100           | Thermofisher, PA5-32287          |
| Versican                  | Rabbit         | 1:200           | Novus, NBP1-85432                |
| Biotinylated anti-Rabbit  | Donkey         | 1:200           | Vector Laboratories, BA-1000     |
| Biotinylated anti-Goat    | Donkey         | 1:200           | Vector Laboratories, BA-9500     |
| Cy 2 anti-mouse           | Donkey         | 1:500           | Vector Laboratories ,715-225-150 |
| Cy 3 anti-rabbit          | Donkey         | 1:500           | Vector Laboratories, 711-165-152 |
| Cy3 anti-rat              | Donkey         | 1:500           | Vector Laboratories, 712-165-153 |
| Cy5 anti-chicken          | Donkey         | 1:500           | Vector Laboratories, 703-605-155 |

**Supplementary Table 1: Antibodies used**

### **Supplementary References:**

1. Schindelin J, Arganda-Carreras I, Frise E, Kaynig V, Longair M, Pietzsch T, et al. Fiji: an open-source platform for biological-image analysis. *Nat Methods*. 2012;9(7):676-82.
2. Montes GS, Junqueira LC. The use of the Picrosirius-polarization method for the study of the biopathology of collagen. *Mem Inst Oswaldo Cruz*. 1991;86 Suppl 3:1-11.
3. Guidolin D, Nico B, Crivellato E, Marzullo A, Vacca A, Ribatti D. Tumoral mast cells exhibit a common spatial distribution. *Cancer Lett*. 2009;273(1):80-5.
4. Witte M, Jaspers S, Wenck H, Rübhausen M, Fischer F. General method for classification of fiber families in fiber-reinforced materials: application to in-vivo human skin images. *Sci Rep*. 2020;10(1):10888.
